# Supplementary material
Source: Springer Nature journal article supplement (https://www.springermedizin.de/resource/supplementary/12960_2013_377_MOESM2_ESM.pdf/9569980)
Supplement: MOESM2 [file 9569980]

---

**Description of the study sample and the topic guide**

**Allopathic students:** These are final year undergraduate allopathic students studying for the Bachelor of Medicine and Bachelor of Surgery (MBBS) degree. Postgraduate students were in the process of obtaining a specialist degree—obtained after 3 years of training in a specific medical specialty.

**Ayurvedic students:** The final year students were studying for the undergraduate Bachelor in Ayurvedic Medicine and Surgery (BAMS) degree that they receive after completing 5.5 years of training.

**Nursing students:** The final year students were studying for the General Nursing and Midwifery (GNM) degree, which they receive after 3.5 years of training.

**In-service health workers:** All the sampled in-service health workers were based at primary health centers (PHC) around 50 km from the nearest town. Allopathic doctors had an MBBS degree, the Ayurvedic doctors a BAMS degree and nurses a GNM degree.

**Topic guide: Students**

- Background
- Career objectives
- Plans after completion of course work
- Expectations from future jobs
- Specific rural urban preferences
- Perceptions of rural employments
- Policy options and incentives that appear appealing

**Topic guide: In-service participants**

- Background
  - Experiences with current job
  - Perceptions on employment in the rural public sector
  - Future plans for careers
  - Attitudes toward retention
  - Discussion on policy options favoring retention
-
